# Supplementary material for: miR-532-3p inhibits the progression of tongue squamous cell carcinoma by targeting podoplanin
Source: PubMed Central journal article supplement — Chin Med J (Engl). 2021 Dec 8;134(24):2999–3008. doi: 10.1097/CM9.0000000000001563 (PMC8710329; doi:10.1097/cm9.0000000000001563), 2021-12-08
Supplement: cm9-134-2999-s003.pdf [file cm9-134-2999-s003.pdf]

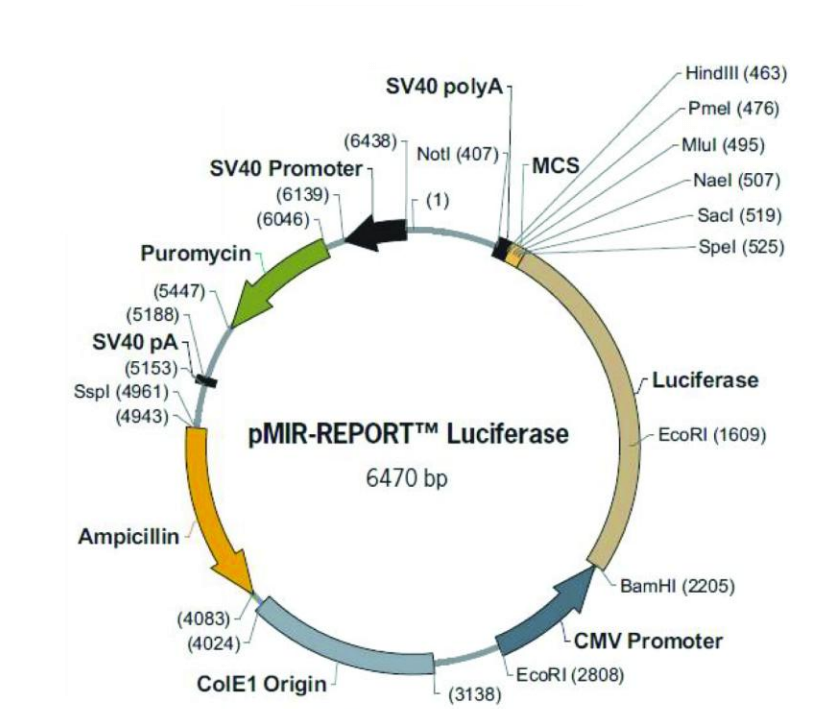

CMV Promoter: 2210–2813  
 Firefly luciferase: 540–2210  
 MCS: 467–539  
 SV40 Poly(A): 404–467  
 SV40 Promoter: 6139–6438

Puromycin: 5447–6046  
 SV40 pA signal: 5153–5188  
 Ampicillin: 4083–4943  
 ColE1 Origin: 3138–4024

**Supplementary Figure 1:** The map of the pMIR-REPORT luciferase vector used in the DLR assay. DLR: Dual-luciferase reporter.
